# Supplementary material for: Cavy lifespan: survival analysis and lifetables for the pet guinea pig (Cavia porcellus, L.) in Britain
Source: PeerJ journal article supplement (doi:10.7717/peerj.19702), 2025-07-18
Supplement: Suplemantal_file_1.pdf [file Suplemantal_file_1.pdf]

The categorical variables in the raw dataset have the following meaning: 0 = absent and 1 = present.
